# Supplementary material
Source: Research Square preprint supplement (doi:10.21203/rs.3.rs-9175799/v1)
Supplement: Supplementary file 1 [file 708799abfbf8de112e43ccef.docx]

**Supplementary Files:**

| **Table S1:** Details of the datasets used in the entire study. | | | | |
| --- | --- | --- | --- | --- |
| **Satellite image** | | | | |
| **Sensor** | **Date** | **Band Configuration** | | **Source** |
| **Band(s)** | **Spatial resolution (m)** |
| Landsat 5 TM | 22/03/1991  17/03/2001  07/03/2009 | Band 1: Blue | 30 | <https://earthexplorer.usgs.gov/> |
| Band 2: Green |
| Band 3: Red |
| Band 4: Near Infrared (NIR) |
| Band 5: Shortwave Infrared (SWIR1) |
| Band 6: Thermal | 120 (30) |
| Band 7: Shortwave Infrared (SWIR2) | 30 |
| Landsat 8 OLI/TIRS | 08/03/2021 | Band 1: Coastal aerosol | 30 |
| Band 2: Blue |
| Band 3: Green |
| Band 4: Red |
| Band 5: Near Infrared (NIR) |
| Band 6: Shortwave Infrared (SWIR1) |
| Band 7: Shortwave Infrared (SWIR2) |
| Band 8: Panchromatic | 15 |
| Band 9: Cirrus | 30 |
| Band 10: Thermal Infrared (TIRS1) | 100 |
| Band 11: Thermal Infrared (TIRS2) |
| **Spatial database for application of ANN** | | | | |
| **Parameter** | **Data format** | **Spatial resolution** | **Source** | |
| Population count | Raster | 0.0083° | <https://sedac.ciesin.columbia.edu/data/set/> | |
| Distribution of building | Vector (point) | Not applicable | [https://www.openstreetmap.org/export#map=7/22.720/87.561](https://www.openstreetmap.org/export%23map=7/22.720/87.561) | |
| Distribution of ATM |
| Distribution of Bank |
| Distribution of bus stop |
| Distribution of pharmacy/ clinic |
| Distribution of educational center |
| Distribution of recreational center |
| Distribution of ferry terminal |
| Distribution of hospital |
| Distribution of primary road | Vector (line) |
| Distribution of railway |
| Distribution of secondary road |
| Distribution of religious center | Vector (point) |
| Distribution of shop |
| Distribution of major town |
| Distribution of railway station |
| Distribution of trunk road | Vector (line) |
| Distribution of river |

| **Table S2:** Average change (%) in Mean LSEQI value (corresponding to different MCDAs) during 1991 – 2021 in different administrative units of KUA. | | | | |
| --- | --- | --- | --- | --- |
| **Name of administrative unit** | **Average change (%) in Mean LSEQI value** | | | |
| **AHP** | **EDAS** | **TOPSIS** | **VIKOR** |
| Non Municipal Area | -4.45 | 0.83 | 5.48 | 0.29 |
| Kolkata Municipal Corporation | -10.12 | -3.42 | 2.35 | 3.82 |
| Sonarpur Rajpur | -6.04 | -0.34 | 3.70 | 1.86 |
| Baruipur | -6.73 | -1.04 | 2.00 | 3.35 |
| Maheshtala | -5.02 | 0.55 | 4.84 | 0.85 |
| Budge Budge | -7.98 | -1.83 | 1.76 | 3.52 |
| Pujali | -7.03 | -1.51 | 2.64 | 2.61 |
| Uluberiya | -6.78 | -1.17 | 2.38 | 3.01 |
| Howrah Municipal Corporation | -9.53 | -2.91 | 2.68 | 3.50 |
| Baly | -11.22 | -3.81 | 2.18 | 3.88 |
| Uttarpara | -6.62 | -0.52 | 4.76 | 1.64 |
| Konnagar | -9.28 | -2.69 | 1.71 | 3.78 |
| Rishra | -10.81 | -3.77 | 1.58 | 4.22 |
| Srirampur | -9.62 | -3.13 | 1.69 | 3.76 |
| Baidyabati | -6.82 | -0.88 | 3.67 | 2.09 |
| Champdani | -6.62 | -0.61 | 4.10 | 1.98 |
| Bhadreswar | -7.77 | -1.77 | 2.55 | 3.35 |
| Chandan Nagar Municipal Corporation | -6.79 | -1.00 | 3.48 | 2.56 |
| Hoogly Chinsura | -9.71 | -3.09 | 1.01 | 4.51 |
| Bansberia | -8.96 | -2.26 | 1.84 | 4.00 |
| Kalyani | -6.53 | -1.05 | 5.14 | 2.23 |
| Gayeshpur | -4.81 | 0.49 | 6.38 | 1.08 |
| Kanchrapara | -8.33 | -1.99 | 2.28 | 3.56 |
| Halisahar | -8.69 | -2.09 | 1.86 | 3.98 |
| Naihati | -9.67 | -2.98 | 1.61 | 4.08 |
| Bhatpara | -6.37 | -0.23 | 4.48 | 1.55 |
| Garulia | -11.40 | -4.47 | -0.41 | 5.44 |
| North Barrackpur | -8.24 | -1.86 | 2.18 | 3.21 |
| Barrackpur | -8.92 | -2.45 | 1.64 | 3.66 |
| Titagarh | -9.86 | -2.86 | 2.39 | 3.84 |
| Khardah | -10.26 | -3.49 | 0.99 | 4.36 |
| Panihati | -8.05 | -1.56 | 3.25 | 2.76 |
| Barasat | -7.25 | -1.45 | 2.86 | 2.74 |
| Madhyamgram | -6.05 | -0.10 | 4.32 | 1.38 |
| New Barrackpur | -10.71 | -3.88 | -0.24 | 5.19 |
| North Dum Dum | -8.52 | -1.93 | 2.94 | 2.97 |
| Dum Dum | -10.68 | -3.79 | 1.31 | 4.26 |
| Rajarhat | -9.80 | -3.47 | 1.45 | 4.41 |
| South Dum Dum | -10.76 | -3.88 | 1.84 | 4.09 |
| Kamarhati | -9.55 | -2.50 | 2.73 | 3.47 |
| Baranagar | -10.50 | -3.42 | 1.85 | 3.84 |
| Bidhan Nagar | -5.73 | -0.11 | 6.47 | 0.73 |

| **Table S3:** Temporal distribution of Mean En_LSEQI and its change (%) in different time stamps along different administrative units in KUA. | | | | | | | | | | | | | | | | | | | | | | | |
| --- | --- | --- | --- | --- | --- | --- | --- | --- | --- | --- | --- | --- | --- | --- | --- | --- | --- | --- | --- | --- | --- | --- | --- |
| **Administrative unit** | **1991** | **2001** | **2009** | **2021** | **Change (%) in mean En_LSEQI** | | | **Administrative unit** | **1991** | **2001** | **2009** | **2021** | **Change (%) in mean En_LSEQI** | | | **Administrative unit** | **1991** | **2001** | **2009** | **2021** | **Change (%) in mean En_LSEQI** | | |
| **1991 - 2001** | **2001 - 2009** | **2009 - 2021** | **1991 - 2001** | **2001 - 2009** | **2009 - 2021** | **Change_91_01** | **Change_01_09** | **Change_09_21** |
| Non Municipal Area | 0.48 | 0.41 | 0.47 | 0.47 | -14.91 | 14.12 | 0.05 | Baidyabati | 0.46 | 0.39 | 0.44 | 0.42 | -16.45 | 13.14 | -3.77 | Barrackpur | 0.45 | 0.37 | 0.42 | 0.39 | -17.65 | 12.84 | -7.77 |
| Kolkata MC | 0.42 | 0.34 | 0.37 | 0.34 | -19.25 | 8.93 | -7.03 | Champdani | 0.46 | 0.39 | 0.45 | 0.42 | -15.14 | 14.98 | -5.41 | Titagarh | 0.38 | 0.30 | 0.33 | 0.31 | -21.14 | 12.53 | -6.02 |
| Sonarpur Rajpur | 0.48 | 0.42 | 0.46 | 0.44 | -13.01 | 9.21 | -2.68 | Bhadreswar | 0.46 | 0.37 | 0.41 | 0.41 | -19.21 | 9.42 | -0.53 | Khardah | 0.43 | 0.35 | 0.39 | 0.35 | -18.74 | 12.49 | -9.59 |
| Baruipur | 0.52 | 0.44 | 0.50 | 0.47 | -15.50 | 13.64 | -5.58 | Chandan Nagar MC | 0.46 | 0.38 | 0.41 | 0.42 | -19.06 | 9.99 | 1.45 | Panihati | 0.43 | 0.36 | 0.41 | 0.38 | -16.59 | 14.57 | -7.05 |
| Maheshtala | 0.48 | 0.42 | 0.47 | 0.47 | -12.97 | 12.71 | -1.85 | Hoogly Chinsura | 0.45 | 0.37 | 0.40 | 0.38 | -18.45 | 7.93 | -5.04 | Barasat | 0.47 | 0.38 | 0.42 | 0.42 | -18.43 | 9.02 | -0.30 |
| Budge Budge | 0.47 | 0.40 | 0.46 | 0.42 | -15.52 | 14.20 | -8.41 | Bansberia | 0.44 | 0.36 | 0.41 | 0.38 | -17.78 | 11.88 | -6.06 | Madhyamgram | 0.45 | 0.37 | 0.43 | 0.42 | -17.89 | 15.00 | -1.36 |
| Pujali | 0.48 | 0.39 | 0.43 | 0.43 | -18.44 | 10.28 | -1.14 | Kalyani | 0.45 | 0.37 | 0.37 | 0.40 | -18.15 | 1.03 | 7.28 | New Barrackpur | 0.45 | 0.36 | 0.39 | 0.36 | -18.80 | 9.06 | -8.54 |
| Uluberiya | 0.50 | 0.42 | 0.45 | 0.45 | -16.59 | 8.85 | -0.35 | Gayeshpur | 0.45 | 0.36 | 0.38 | 0.42 | -18.98 | 6.07 | 9.56 | North Dum Dum | 0.44 | 0.37 | 0.42 | 0.38 | -15.31 | 12.57 | -8.89 |
| Howrah MC | 0.40 | 0.32 | 0.36 | 0.34 | -20.61 | 12.42 | -6.09 | Kanchrapara | 0.46 | 0.38 | 0.42 | 0.40 | -16.66 | 10.17 | -4.88 | Dum Dum | 0.42 | 0.34 | 0.36 | 0.34 | -19.69 | 7.50 | -6.68 |
| Baly | 0.37 | 0.28 | 0.34 | 0.30 | -23.67 | 19.47 | -11.26 | Halisahar | 0.46 | 0.39 | 0.43 | 0.40 | -15.00 | 10.95 | -7.62 | Rajarhat | 0.46 | 0.39 | 0.40 | 0.38 | -15.54 | 3.03 | -6.03 |
| Uttarpara | 0.41 | 0.34 | 0.39 | 0.38 | -16.93 | 13.56 | -2.17 | Naihati | 0.44 | 0.37 | 0.41 | 0.37 | -15.29 | 9.06 | -9.25 | South Dum Dum | 0.41 | 0.33 | 0.35 | 0.33 | -19.58 | 5.99 | -6.40 |
| Konnagar | 0.43 | 0.36 | 0.39 | 0.36 | -16.58 | 9.57 | -7.07 | Bhatpara | 0.45 | 0.38 | 0.44 | 0.42 | -16.56 | 16.17 | -3.77 | Kamarhati | 0.39 | 0.32 | 0.37 | 0.34 | -18.26 | 13.78 | -8.24 |
| Rishra | 0.39 | 0.32 | 0.34 | 0.32 | -19.31 | 7.94 | -7.57 | Garulia | 0.44 | 0.35 | 0.38 | 0.35 | -20.32 | 7.82 | -7.93 | Baranagar | 0.39 | 0.31 | 0.35 | 0.32 | -20.02 | 11.94 | -8.47 |
| Srirampur | 0.42 | 0.33 | 0.37 | 0.35 | -19.94 | 10.53 | -5.73 | North Barrackpur | 0.45 | 0.38 | 0.43 | 0.40 | -16.94 | 13.76 | -7.11 | Bidhan Nagar | 0.41 | 0.34 | 0.39 | 0.39 | -16.88 | 13.54 | -1.13 |

| **Table S4:** Architectural details of the ANNs used for prediction of LULC of 2030 for KUA as a whole unit and different administrative units of KUA | | | | | | | | | | | | |
| --- | --- | --- | --- | --- | --- | --- | --- | --- | --- | --- | --- | --- |
| **Administrative Unit** | **No of samples** | **Neighbourhood** | **Learning Rate** | **Maximum Iteration** | **Hidden Layer (no. of neurons)** | **Momentum** | **Min validation Overall error** | **Current validation Kappa** | **Validation Kappa local (2021)** | **Correctness(%)** | **Validation Kappa historical (2021)** | **Validation Kappa overall (2021)** |
| KUA as a whole unit | 5000 | 1 | 0.001 | 1000 | 1(50) | 0.00 | 0.07 | 0.56 | 0.94 | 86.86 | 0.80 | 0.76 |
| **Different administrative units of KUA** | | | | | | | | | | | | |
| Baidyabati | 5000 | 1 | 0.001 | 200 | 1(20) | 0.00 | 0.03 | 0.81 | 0.99 | 96.69 | 0.91 | 0.91 |
| Baly | 5000 | 1 | 0.001 | 200 | 1(30) | 0.00 | 0.02 | 0.83 | 0.82 | 94.86 | 0.74 | 0.60 |
| Bansberia | 5000 | 1 | 0.001 | 200 | 1(80) | 0.00 | 0.03 | 0.85 | 0.89 | 92.93 | 0.93 | 0.83 |
| Baranagar | 5000 | 1 | 0.001 | 200 | 1(80) | 0.00 | 0.02 | 0.88 | 0.88 | 96.17 | 0.81 | 0.71 |
| Barasat | 25000 | 1 | 0.001 | 200 | 1(50) | 0.00 | 0.05 | 0.66 | 0.92 | 88.48 | 0.81 | 0.75 |
| Barrackpore | 5000 | 1 | 0.001 | 200 | 3(200,200,200) | 0.00 | 0.05 | 0.75 | 0.89 | 88.97 | 0.75 | 0.67 |
| Baruipur | 5000 | 1 | 0.001 | 200 | 4(50 50 50 50) | 0.00 | 0.07 | 0.63 | 0.87 | 88.76 | 0.94 | 0.82 |
| Bhadreshwar | 5000 | 1 | 0.001 | 500 | 1(100) | 0.00 | 0.03 | 0.83 | 0.99 | 94.98 | 0.90 | 0.89 |
| Bhatpara | 5000 | 1 | 0.001 | 200 | 5(50 50 50 50 50) | 0.00 | 0.01 | 0.96 | 0.88 | 90.88 | 0.92 | 0.81 |
| Bidhan Nagar | 5000 | 1 | 0.001 | 200 | 5(50 50 50 50 50) | 0.00 | 0.05 | 0.76 | 0.83 | 88.73 | 0.95 | 0.78 |
| Budge Budge | 5000 | 1 | 0.001 | 200 | 3(100 50 30) | 0.00 | 0.06 | 0.63 | 0.98 | 93.83 | 0.91 | 0.89 |
| Champadani | 5000 | 1 | 0.001 | 200 | 1(50) | 0.00 | 0.02 | 0.89 | 0.91 | 94.00 | 0.95 | 0.87 |
| Chandan Nagar MC | 5000 | 1 | 0.001 | 200 | 3(20 20 20) | 0.00 | 0.06 | 0.64 | 0.98 | 90.40 | 0.83 | 0.81 |
| Dum Dum | 5000 | 1 | 0.001 | 200 | 1(50) | 0.00 | 0.03 | 0.83 | 0.80 | 92.78 | 0.65 | 0.52 |
| Garulia | 5000 | 1 | 0.001 | 200 | 1(55) | 0.00 | 0.05 | 64920.00 | 0.59 | 81.09 | 0.91 | 0.54 |
| Gayeshpur | 5000 | 1 | 0.001 | 200 | 4(50 50 50 50) | 0.00 | 0.07 | 0.63 | 0.87 | 88.76 | 0.94 | 0.82 |
| Halisahar | 5000 | 1 | 0.001 | 200 | 1(50) | 0.00 | 0.02 | 0.90 | 1.00 | 99.18 | 0.98 | 0.97 |
| Howrah MC | 5000 | 1 | 0.001 | 200 | 3(50 50 50) | 0.00 | 0.03 | 0.81 | 0.88 | 92.85 | 0.79 | 0.69 |
| Hugli Chinsura | 5000 | 1 | 0.001 | 200 | 3(50 50 50) | 0.00 | 0.05 | 0.78 | 0.82 | 89.37 | 0.71 | 0.59 |
| Kalyani | 5000 | 1 | 0.001 | 200 | 3(50 50 50) | 0.00 | 0.05 | 0.83 | 0.78 | 76.33 | 0.80 | 0.62 |
| Kamarhati | 5000 | 1 | 0.001 | 200 | 1(50) | 0.00 | 0.03 | 0.83 | 0.80 | 92.78 | 0.65 | 0.52 |
| Kanchrapara | 5000 | 1 | 0.001 | 200 | 2(50 50) | 0.00 | 0.05 | 0.79 | 0.86 | 90.43 | 0.93 | 0.80 |
| Khardah | 5000 | 1 | 0.001 | 200 | 2(50 50) | 0.00 | 0.02 | 0.90 | 0.85 | 94.73 | 0.73 | 0.62 |
| Kolkata MC | 5000 | 1 | 0.01 | 1000 | 1(10) | 0.01 | 0.03 | 0.80 | 0.91 | 85.40 | 0.86 | 0.69 |
| Konnagar | 5000 | 1 | 0.001 | 200 | 2(50 50) | 0.00 | 0.02 | 0.93 | 0.81 | 94.33 | 0.81 | 0.65 |
| Madhyamgram | 5000 | 1 | 0.001 | 200 | 5(100 100 100 100 100) | 0.00 | 0.07 | 0.69 | 0.81 | 83.19 | 0.80 | 0.64 |
| Maheshtala | 5000 | 1 | 0.001 | 200 | 1(50) | 0.00 | 0.04 | 0.80 | 0.90 | 92.45 | 0.93 | 0.83 |
| Naihati | 5000 | 1 | 0.001 | 200 | 1(50) | 0.00 | 0.03 | 0.91 | 0.77 | 93.38 | 0.98 | 0.76 |
| New Barrackpore | 5000 | 1 | 0.001 | 200 | 4(50 50 50 50) | 0.00 | 0.07 | 0.63 | 0.87 | 88.76 | 0.94 | 0.82 |
| Non_Municipal | 5000 | 1 | 0.001 | 200 | 1(50) | 0.00 | 0.03 | 0.83 | 0.80 | 92.78 | 0.65 | 0.52 |
| North Barrackpore | 5000 | 1 | 0.001 | 200 | 1(50) | 0.00 | 0.04 | 0.84 | 0.80 | 85.40 | 0.86 | 0.69 |
| North Dum Dum | 5000 | 1 | 0.001 | 200 | 1(50) | 0.00 | 0.03 | 0.87 | 0.82 | 92.86 | 0.90 | 0.74 |
| Panihati | 5000 | 1 | 0.001 | 200 | 1(50) | 0.00 | 0.03 | 0.86 | 0.66 | 90.64 | 0.83 | 0.55 |
| Pujali | 5000 | 1 | 0.001 | 200 | 3(50 50 50) | 0.00 | 0.06 | 0.70 | 0.88 | 89.50 | 0.93 | 0.82 |
| Rajarhat | 5000 | 1 | 0.001 | 200 | 5(50 50 50 50 50) | 0.00 | 0.05 | 0.76 | 0.85 | 88.62 | 0.78 | 0.67 |
| Rishra | 5000 | 1 | 0.001 | 200 | 4(50 50 50 50) | 0.00 | 0.07 | 0.63 | 0.87 | 88.76 | 0.94 | 0.82 |
| Sonarpur Rajpur | 5000 | 1 | 0.001 | 200 | 1(55) | 0.00 | 0.05 | 64920.00 | 0.59 | 81.09 | 0.91 | 0.54 |
| South Dum Dum | 5000 | 1 | 0.001 | 200 | 1(55) | 0.00 | 0.02 | 0.84 | 0.89 | 96.42 | 0.79 | 0.71 |
| Srirampur | 5000 | 1 | 0.001 | 200 | 1(55) | 0.00 | 0.02 | 0.88 | 0.81 | 91.90 | 0.84 | 0.67 |
| Titagarh | 5000 | 1 | 0.001 | 200 | 1(55) | 0.00 | 0.02 | 0.87 | 0.66 | 90.05 | 0.94 | 0.62 |
| Uluberiya | 5000 | 1 | 0.001 | 200 | 1(50) | 0.00 | 0.09 | 0.41 | 0.97 | 93.06 | 0.92 | 0.89 |
| Uttarpara | 5000 | 1 | 0.001 | 200 | 3(50 50 50) | 0.00 | 0.04 | 0.77 | 0.69 | 86.51 | 0.92 | 0.64 |

| **Table S5:** Distribution of mean LSE parameter values along different LSEQI zones extracted from different MCDA methods | | | | | | | | | | | | | |
| --- | --- | --- | --- | --- | --- | --- | --- | --- | --- | --- | --- | --- | --- |
| LSEQI Values | | Year - 1991 | | | | | LSEQI Values | | Year - 2001 | | | | |
| NDVI | NDBI | NDBaI | LST | SMI | NDVI | NDBI | NDBaI | LST | SMI |
| AHP | Low | 0.125 | -0.022 | -0.561 | 33.783 | 0.771 | AHP | Low | 0.108 | 0.009 | -0.566 | 37.056 | 0.684 |
| Moderate | 0.158 | -0.058 | -0.562 | 32.280 | 0.811 | Moderate | 0.149 | -0.046 | -0.564 | 33.660 | 0.777 |
| High | 0.208 | -0.093 | -0.551 | 31.446 | 0.834 | High | 0.235 | -0.115 | -0.541 | 32.117 | 0.819 |
| EDAS | Low | 0.104 | -0.024 | -0.563 | 33.548 | 0.778 | EDAS | Low | 0.092 | 0.002 | -0.559 | 36.449 | 0.700 |
| Moderate | 0.161 | -0.045 | -0.550 | 33.044 | 0.791 | Moderate | 0.154 | -0.042 | -0.557 | 33.998 | 0.767 |
| High | 0.204 | -0.080 | -0.553 | 31.814 | 0.824 | High | 0.235 | -0.108 | -0.558 | 32.326 | 0.813 |
| TOPSIS | Low | 0.110 | 0.003 | -0.567 | 35.068 | 0.737 | TOPSIS | Low | 0.114 | 0.010 | -0.570 | 36.703 | 0.693 |
| Moderate | 0.153 | -0.057 | -0.564 | 32.343 | 0.810 | Moderate | 0.149 | -0.049 | -0.566 | 33.637 | 0.777 |
| High | 0.236 | -0.122 | -0.541 | 30.883 | 0.849 | High | 0.233 | -0.119 | -0.537 | 32.296 | 0.814 |
| VIKOR | Low | 0.122 | -0.006 | -0.569 | 34.751 | 0.746 | VIKOR | Low | 0.120 | 0.005 | -0.573 | 36.520 | 0.698 |
| Moderate | 0.158 | -0.064 | -0.567 | 32.019 | 0.818 | Moderate | 0.153 | -0.053 | -0.568 | 33.441 | 0.783 |
| High | 0.230 | -0.124 | -0.543 | 30.706 | 0.853 | High | 0.234 | -0.124 | -0.539 | 32.022 | 0.821 |
| LSEQI Values | | Year - 2009 | | | | | LSEQI Values | | Year - 2021 | | | | |
| NDVI | NDBI | NDBaI | LST | SMI | NDVI | NDBI | NDBaI | LST | SMI |
| AHP | Low | 0.093 | 0.007 | -0.562 | 36.081 | 0.732 | AHP | Low | 0.112 | 0.026 | -0.553 | 36.046 | 0.163 |
| Moderate | 0.174 | -0.047 | -0.562 | 33.877 | 0.780 | Moderate | 0.193 | -0.028 | -0.553 | 33.841 | 0.212 |
| High | 0.274 | -0.129 | -0.560 | 31.266 | 0.837 | High | 0.293 | -0.110 | -0.551 | 31.230 | 0.269 |
| EDAS | Low | 0.085 | 0.008 | -0.565 | 36.074 | 0.732 | EDAS | Low | 0.104 | 0.028 | -0.556 | 36.038 | 0.163 |
| Moderate | 0.170 | -0.042 | -0.560 | 34.121 | 0.775 | Moderate | 0.189 | -0.022 | -0.551 | 34.085 | 0.206 |
| High | 0.268 | -0.122 | -0.558 | 31.493 | 0.832 | High | 0.287 | -0.103 | -0.549 | 31.457 | 0.264 |
| TOPSIS | Low | 0.100 | 0.008 | -0.555 | 36.192 | 0.729 | TOPSIS | Low | 0.119 | 0.028 | -0.546 | 36.156 | 0.161 |
| Moderate | 0.170 | -0.049 | -0.567 | 33.696 | 0.784 | Moderate | 0.189 | -0.030 | -0.558 | 33.660 | 0.216 |
| High | 0.417 | -0.131 | -0.563 | 31.303 | 0.837 | High | 0.436 | -0.112 | -0.554 | 31.267 | 0.268 |
| VIKOR | Low | 0.105 | 0.006 | -0.563 | 35.998 | 0.734 | VIKOR | Low | 0.124 | 0.026 | -0.554 | 35.962 | 0.165 |
| Moderate | 0.175 | -0.053 | -0.567 | 33.654 | 0.785 | Moderate | 0.194 | -0.034 | -0.558 | 33.618 | 0.217 |
| High | 0.272 | -0.136 | -0.556 | 31.155 | 0.840 | High | 0.291 | -0.117 | -0.547 | 31.119 | 0.271 |


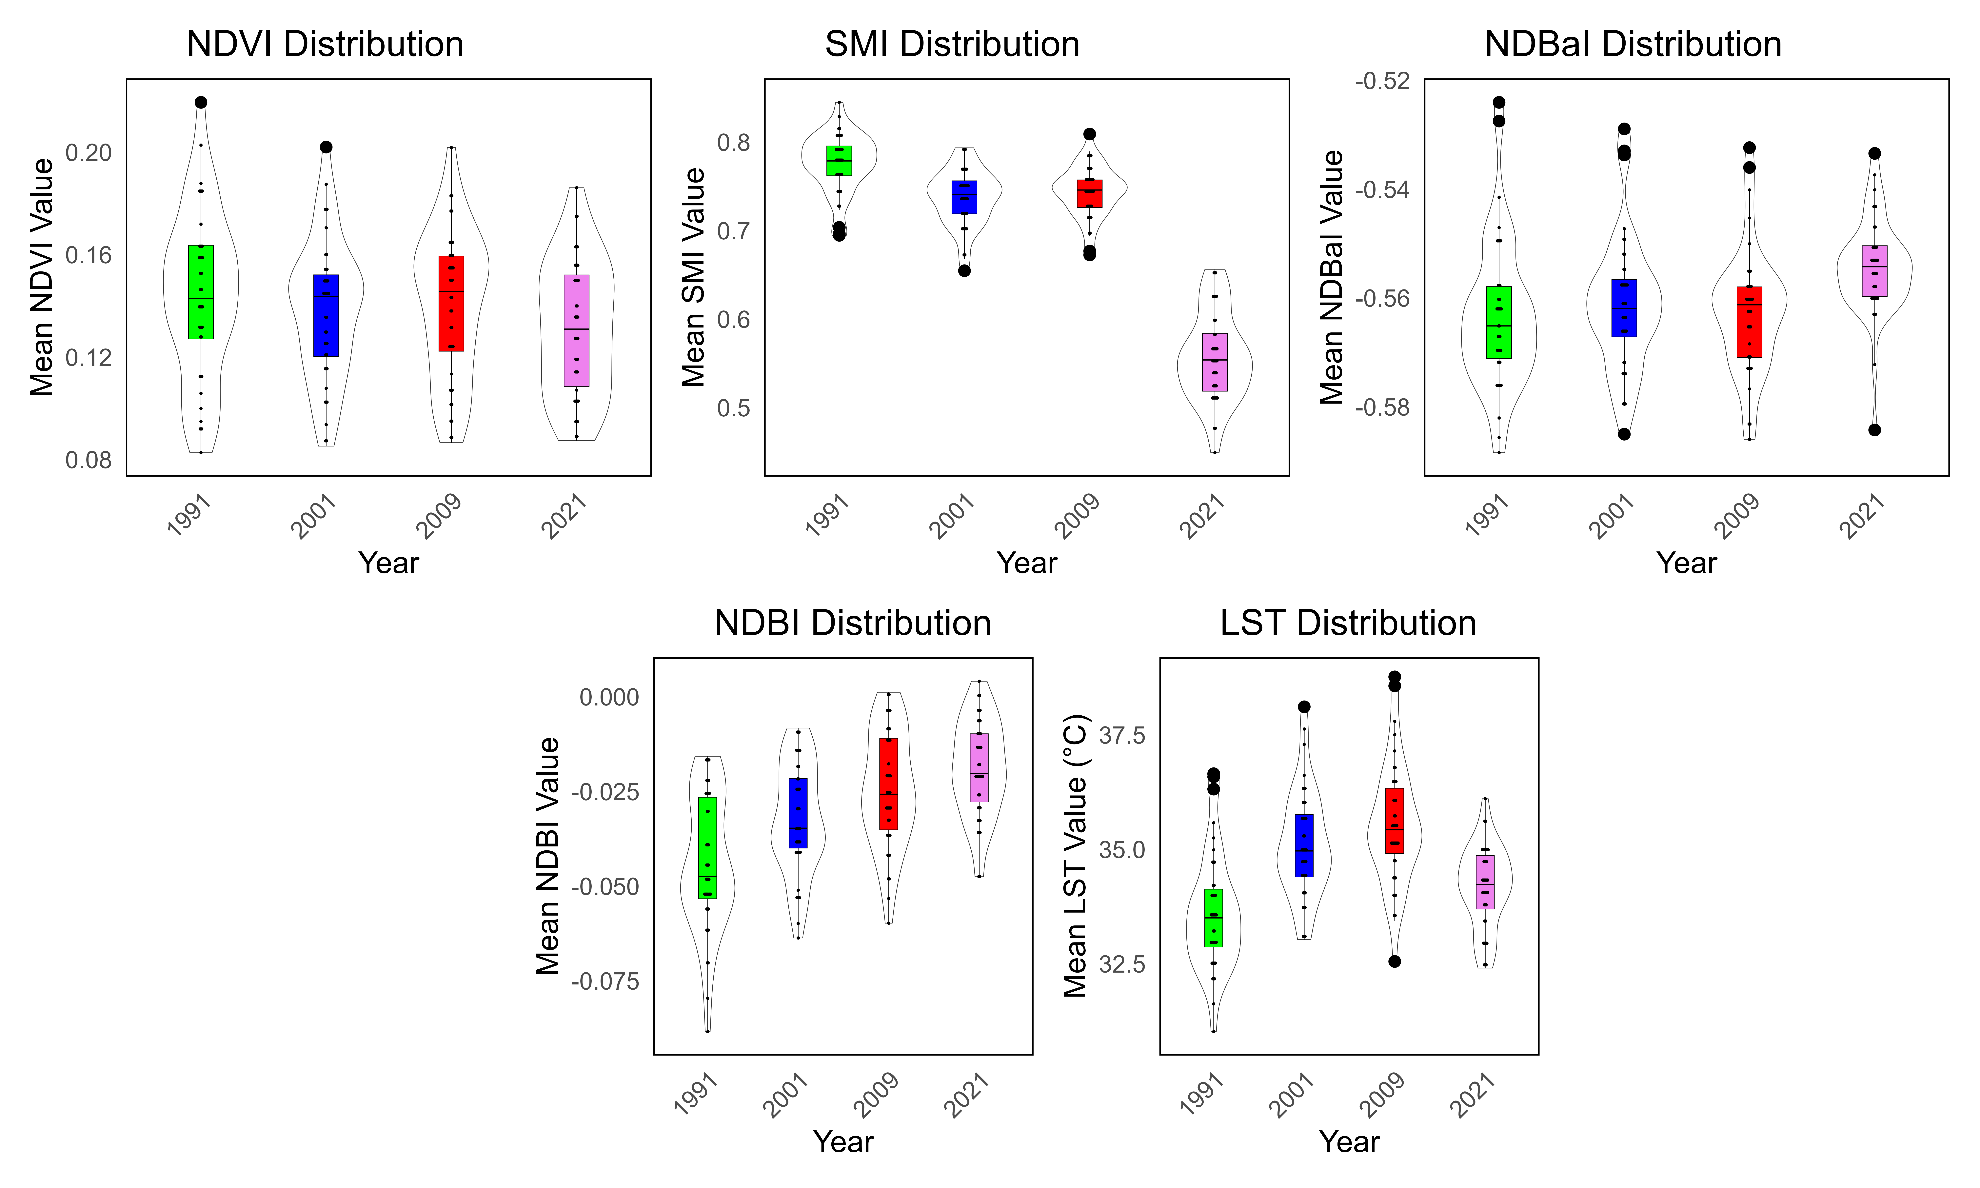


**Figure S1:** Distribtion of different LSE parameters along different time stamps in the KUA region.


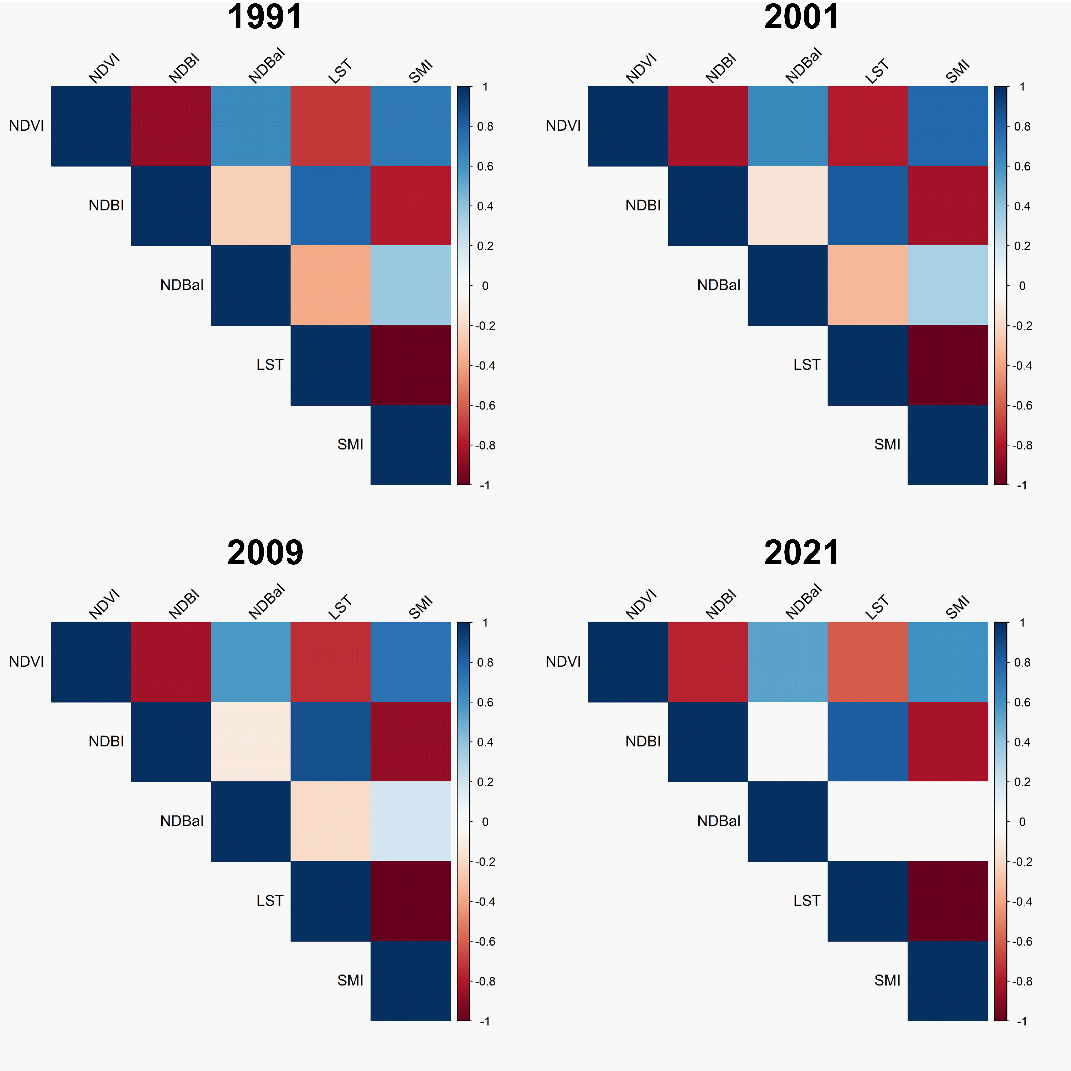


**Figure S2:** Correlation Coefficient value (r) between LSE parameters within different administrative units of KUA in different time stamps.

**
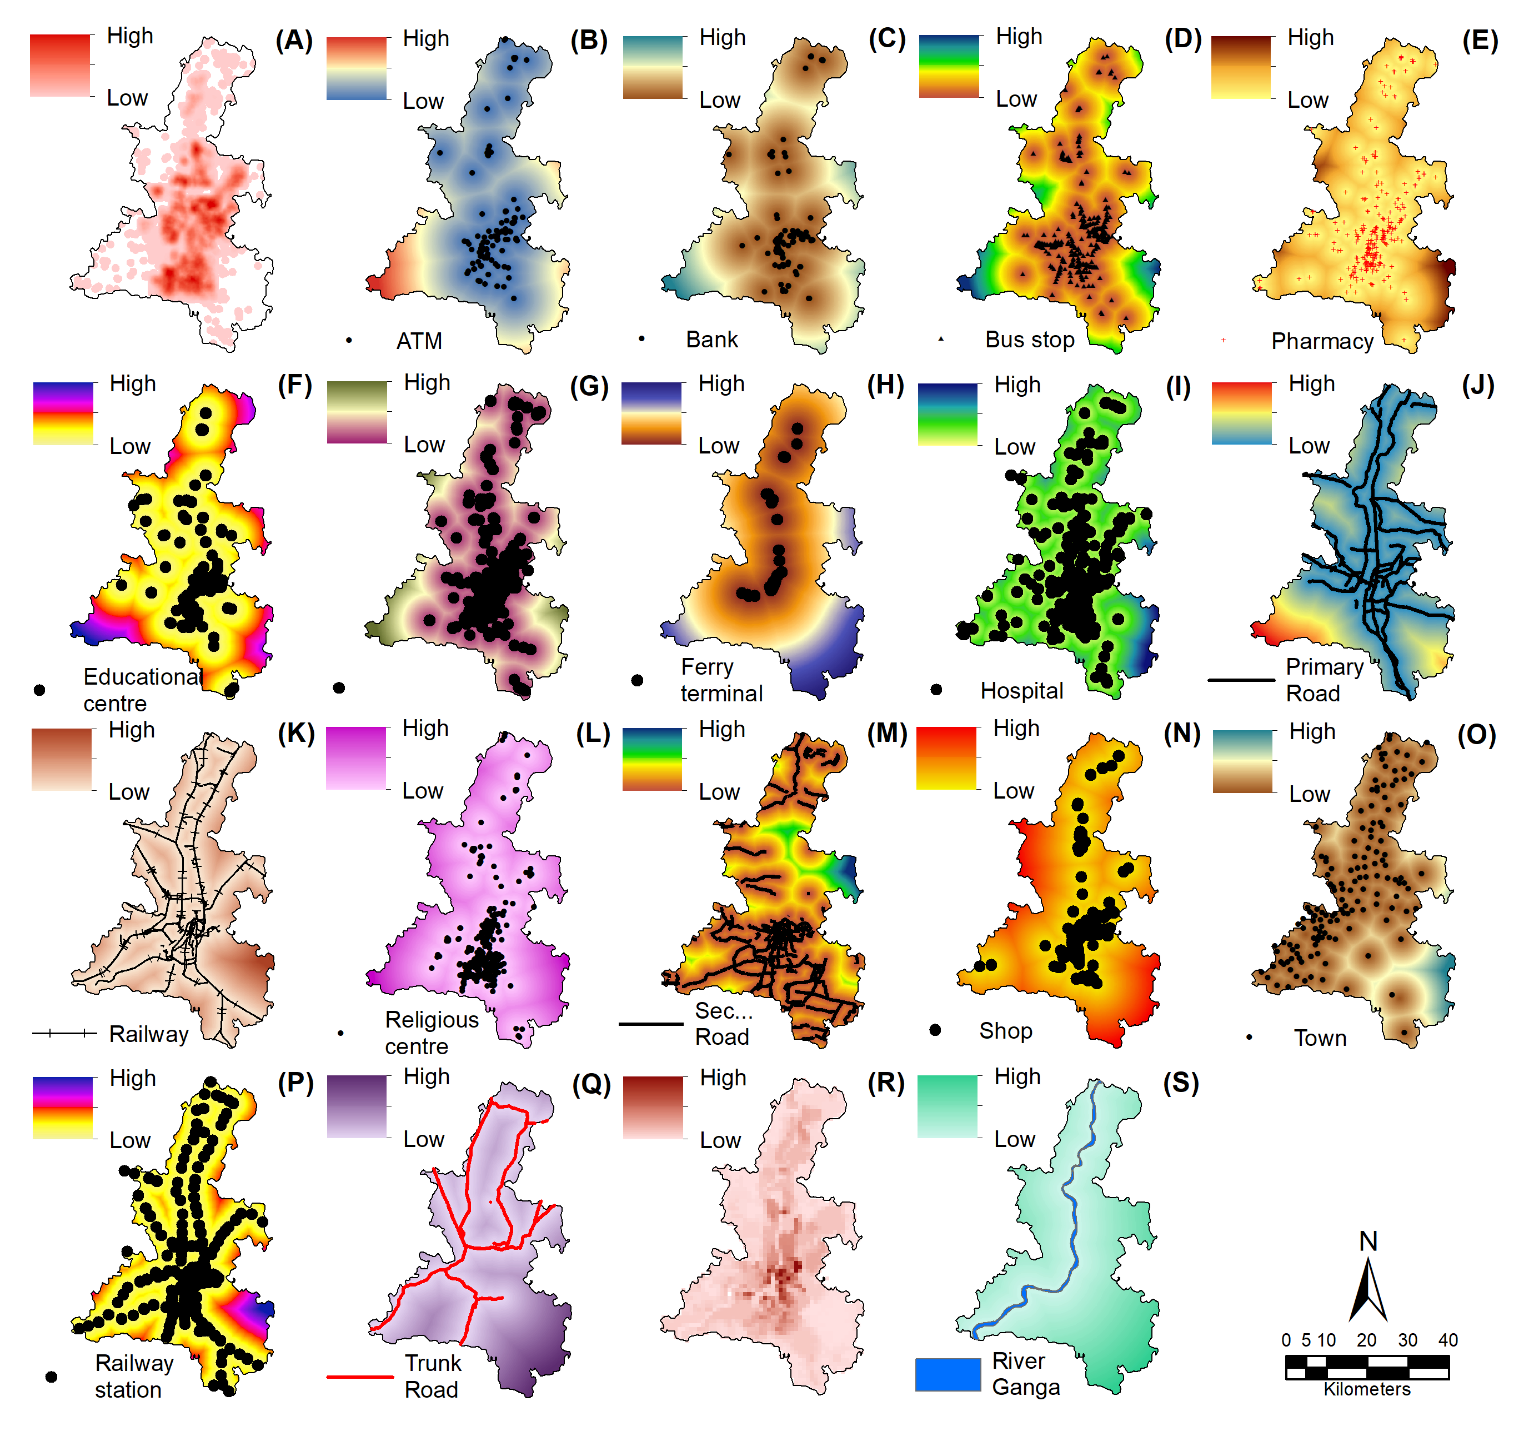
**

**Figure S3:** Areal distribution of different spatial factors contributing to landuse land cover change in the KUA region: (A) Building density; (B) Distance from ATM; (C) Distance from bank; (D) Distance from bus stop; (E) Distance from pharmacy/ clinics; (F) Distance from educational centres (school/ college/ university); (G) Distance from recreational centre; (H) Distance from ferry terminal; (I) Distance from hospital; (J) Distance from primary road; (K) Distance from railway; (L) Distance from religious centre; (M) Distance from secondary road; (N) Distance from shop; (O) Distance from major towns; (P) Distance from railway station; (Q) Distance from trunk road; (R) Population count; (S) Distance from river.
